# Supplementary material for: Motor expertise affects the unconscious processing of geometric forms
Source: PeerJ. 2020 Jul 8;8:e9520. doi: 10.7717/peerj.9520 (PMC7353910; doi:10.7717/peerj.9520)
Supplement: Data S1 — This includes personal information (e.g., sex, age, training years), the mean RTs, ERs and identification rates, reaction time and response for college students across all 168 trials and the reaction time and response for table tennis players across all 168 trials. The identification rates d’ were used for statistical analysis to assess prime visibility, and the mean RTs and ERs were used for statistical analysis to compare athletes and non-athletes on congruent and incongruent trials. [file peerj-08-9520-s001.xlsx]

## Sheet: personal information
Subject	Group 1=novices, 2=table tennis athletes	Sex 1=female, 2=male	Age	training years	weekly training times
101	1	2	19
102	1	2	20
103	1	2	21
104	1	2	21
105	1	2	20
106	1	2	19
107	1	2	19
108	1	2	19
109	1	2	20
110	1	2	19
111	1	2	20
112	1	2	18
113	1	2	18
114	1	2	21
115	1	2	19
116	1	2	18
117	1	1	20
118	1	1	22
119	1	1	20
120	1	1	20
121	1	1	20
122	1	1	21
123	1	1	20
124	1	1	22
125	1	1	20
126	1	1	20
201	2	2	20	5	2
202	2	2	21	5	3
203	2	2	21	6	2
204	2	2	22	14	3
205	2	2	21	3	2
206	2	2	19	6	2
207	2	2	23	10	2
208	2	2	20	14	6
209	2	2	22	6	2
210	2	2	21	5	2
211	2	2	22	8	7
212	2	1	20	9	5
213	2	2	21	7	2
214	2	2	23	3	2
215	2	1	20	10	5
216	2	1	21	5	5
217	2	2	21	3	5
218	2	2	19	6	6
219	2	1	20	12	4
220	2	2	19	10	3
221	2	1	18	9	6
222	2	1	20	10	3
223	2	1	19	10	6
224	2	1	19	13	3
225	2	1	19	10	3

## Sheet: RT-ER
Subject	Group 1=novices, 2=table tennis athletes	Congruent(RT:ms)	Incongruent(RT:ms)	Congruent(ER：%)	Incongruent(ER：%)	d'	unconscious response priming
101	1	491.74	503.177	8	6	0	11.437
102	1	574.62	577.064	5	6	0.181	2.44385
103	1	462.148	445.148	26	26	-0.441	-17
104	1	434.831	425.472	5	6	0.331	-9.35881
105	1	539.614	517.859	17	14	0	-21.7551
106	1	457.534	456.547	13	24	0.268	-0.987372
107	1	519.812	525.456	17	18	0.412	5.64429
108	1	469.258	483.583	21	29	-0.771	14.3258
109	1	528.697	521.716	21	20	0.083	-6.98055
110	1	568.271	570.067	42	44	-0.215	1.79583
111	1	496.486	517.785	13	23	0.268	21.2985
112	1	512.547	530.9	8	17	0.666	18.3533
113	1	508.091	491.184	21	8	0.406	-16.9067
114	1	450.649	445.317	32	27	0.75	-5.33246
115	1	502.486	513.246	15	17	-0.674	10.7607
116	1	441.134	430.355	19	25	0.346	-10.7795
117	1	509.653	513.077	11	7	0.377	3.42359
118	1	507.696	512.444	18	13	-0.412	4.74879
119	1	618.403	604.053	8	8	-0.181	-14.35
120	1	462.481	457.156	6	7	-0.345	-5.32517
121	1	494.377	495.625	7	13	0	1.24838
122	1	467.726	478.338	12	14	-0.227	10.612
123	1	496.65	498.52	5	10	0.215	1.87
124	1	519.622	508.883	1	7	0.6	-10.7388
125	1	472.526	490.729	10	17	0.23	18.2023
126	1	507.547	523.04	10	10	-0.23	15.4933
201	2	461.262	481.29	20	25	-0.32	20.0288
202	2	398.906	432.308	23	38	0.582	33.4014
203	2	528.683	523.222	24	13	1.164	-5.46032
204	2	436.986	460.754	17	32	-1.06	23.7689
205	2	475.275	495.729	18	30	0.227	20.4535
206	2	507.375	520.058	13	18	0.562	12.683
207	2	479.816	485.042	10	14	1.077	5.22588
208	2	514.468	509.474	7	7	-1.055	-4.99317
209	2	460.268	483.171	14	17	-0.377	22.9038
210	2	501.958	516.986	14	15	-0.337	15.0276
211	2	473.97	490.921	20	25	0.582	16.9505
212	2	671.915	666.506	1	0	0.185	-5.40861
213	2	563.215	562.89	4	12	-0.454	-0.324779
214	2	474.959	500.51	10	38	-0.66	25.5513
215	2	507.025	496.034	6	30	1.169	-10.9908
216	2	473.632	472.211	8	31	0.495	-1.42105
217	2	429	454.698	6	37	-0.809	25.6981
218	2	423.588	443.241	18	35	0.179	19.6525
219	2	454.486	490.542	13	42	0.887	36.0556
220	2	491.041	499.345	10	33	1.372	8.30491
221	2	557.9	561.295	14	26	-0.454	3.39508
222	2	518.69	522.333	13	38	0.722	3.64319
223	2	463.938	456.612	24	42	0.104	-7.32526
224	2	482.554	496.586	12	30	0.56	14.0322
225	2	477.873	486.421	6	31	-0.772	8.54763

## Sheet: 101
Subject	Condition 1=congruent, 2=incongruent	Reaction time（ms）	1=correct, 0=wrong
101	1	436	0
101	1	510	0
101	1	607	0
101	1	476	0
101	1	472	0
101	1	468	0
101	1	496	0
101	2	596	0
101	2	440	0
101	2	440	0
101	2	534	0
101	2	0	0
101	1	677	1
101	1	496	1
101	1	450	1
101	1	451	1
101	1	444	1
101	1	450	1
101	1	417	1
101	1	459	1
101	1	640	1
101	1	437	1
101	1	542	1
101	1	577	1
101	1	556	1
101	1	502	1
101	1	418	1
101	1	606	1
101	1	570	1
101	1	399	1
101	1	462	1
101	1	560	1
101	1	543	1
101	1	428	1
101	1	617	1
101	1	549	1
101	1	531	1
101	1	477	1
101	1	486	1
101	1	403	1
101	1	351	1
101	1	558	1
101	1	562	1
101	1	465	1
101	1	457	1
101	1	467	1
101	1	512	1
101	1	505	1
101	1	611	1
101	1	472	1
101	1	603	1
101	1	456	1
101	1	533	1
101	1	520	1
101	1	536	1
101	1	511	1
101	1	502	1
101	1	608	1
101	1	446	1
101	1	428	1
101	1	553	1
101	1	438	1
101	1	437	1
101	1	373	1
101	1	426	1
101	1	480	1
101	1	397	1
101	1	502	1
101	1	521	1
101	1	412	1
101	1	632	1
101	1	585	1
101	1	466	1
101	1	441	1
101	1	397	1
101	1	507	1
101	1	533	1
101	1	629	1
101	1	602	1
101	1	517	1
101	1	389	1
101	1	401	1
101	1	409	1
101	1	383	1
101	1	438	1
101	1	500	1
101	1	399	1
101	1	432	1
101	1	415	1
101	2	478	1
101	2	429	1
101	2	489	1
101	2	693	1
101	2	540	1
101	2	608	1
101	2	511	1
101	2	487	1
101	2	409	1
101	2	399	1
101	2	431	1
101	2	509	1
101	2	556	1
101	2	393	1
101	2	523	1
101	2	477	1
101	2	512	1
101	2	565	1
101	2	593	1
101	2	520	1
101	2	461	1
101	2	540	1
101	2	455	1
101	2	559	1
101	2	436	1
101	2	557	1
101	2	409	1
101	2	594	1
101	2	612	1
101	2	452	1
101	2	537	1
101	2	532	1
101	2	442	1
101	2	507	1
101	2	510	1
101	2	518	1
101	2	464	1
101	2	538	1
101	2	479	1
101	2	479	1
101	2	556	1
101	2	533	1
101	2	572	1
101	2	630	1
101	2	586	1
101	2	509	1
101	2	486	1
101	2	538	1
101	2	497	1
101	2	430	1
101	2	617	1
101	2	453	1
101	2	478	1
101	2	573	1
101	2	472	1
101	2	449	1
101	2	473	1
101	2	444	1
101	2	445	1
101	2	405	1
101	2	506	1
101	2	394	1
101	2	413	1
101	2	558	1
101	2	461	1
101	2	568	1
101	2	500	1
101	2	506	1
101	2	524	1
101	2	459	1
101	2	488	1
101	2	588	1
101	2	621	1
101	2	471	1
101	2	506	1
101	2	512	1
101	2	417	1
101	2	451	1
101	2	459	1

## Sheet: 102
Subject	Condition 1=congruent, 2=incongruent	Reaction time（ms）	1=correct, 0=wrong
102	1	509	0
102	1	629	0
102	1	1045	0
102	1	574	0
102	2	518	0
102	2	836	0
102	2	428	0
102	2	507	0
102	2	568	0
102	1	546	1
102	1	533	1
102	1	502	1
102	1	601	1
102	1	596	1
102	1	798	1
102	1	594	1
102	1	543	1
102	1	559	1
102	1	506	1
102	1	839	1
102	1	533	1
102	1	972	1
102	1	775	1
102	1	487	1
102	1	548	1
102	1	503	1
102	1	498	1
102	1	438	1
102	1	789	1
102	1	540	1
102	1	486	1
102	1	565	1
102	1	709	1
102	1	673	1
102	1	461	1
102	1	920	1
102	1	550	1
102	1	471	1
102	1	466	1
102	1	572	1
102	1	524	1
102	1	412	1
102	1	460	1
102	1	600	1
102	1	712	1
102	1	559	1
102	1	522	1
102	1	562	1
102	1	483	1
102	1	720	1
102	1	910	1
102	1	480	1
102	1	537	1
102	1	538	1
102	1	464	1
102	1	580	1
102	1	638	1
102	1	544	1
102	1	493	1
102	1	537	1
102	1	622	1
102	1	589	1
102	1	594	1
102	1	465	1
102	1	495	1
102	1	560	1
102	1	583	1
102	1	665	1
102	1	728	1
102	1	481	1
102	1	506	1
102	1	535	1
102	1	467	1
102	1	547	1
102	1	670	1
102	1	510	1
102	1	552	1
102	1	599	1
102	1	622	1
102	1	554	1
102	1	710	1
102	1	460	1
102	1	759	1
102	1	466	1
102	1	628	1
102	1	629	1
102	1	466	1
102	1	487	1
102	1	570	1
102	2	562	1
102	2	823	1
102	2	560	1
102	2	530	1
102	2	673	1
102	2	628	1
102	2	544	1
102	2	658	1
102	2	627	1
102	2	672	1
102	2	556	1
102	2	625	1
102	2	567	1
102	2	528	1
102	2	569	1
102	2	553	1
102	2	660	1
102	2	619	1
102	2	627	1
102	2	750	1
102	2	736	1
102	2	523	1
102	2	510	1
102	2	506	1
102	2	566	1
102	2	517	1
102	2	523	1
102	2	591	1
102	2	674	1
102	2	563	1
102	2	828	1
102	2	551	1
102	2	515	1
102	2	640	1
102	2	546	1
102	2	493	1
102	2	570	1
102	2	430	1
102	2	592	1
102	2	539	1
102	2	510	1
102	2	576	1
102	2	572	1
102	2	508	1
102	2	569	1
102	2	556	1
102	2	612	1
102	2	612	1
102	2	551	1
102	2	837	1
102	2	606	1
102	2	1226	1
102	2	574	1
102	2	495	1
102	2	489	1
102	2	517	1
102	2	642	1
102	2	561	1
102	2	542	1
102	2	530	1
102	2	563	1
102	2	774	1
102	2	472	1
102	2	521	1
102	2	545	1
102	2	493	1
102	2	521	1
102	2	576	1
102	2	543	1
102	2	518	1
102	2	526	1
102	2	526	1
102	2	483	1
102	2	634	1
102	2	577	1
102	2	448	1
102	2	653	1
102	2	533	1
102	2	502	1

## Sheet: 103
Subject	Condition 1=congruent, 2=incongruent	Reaction time（ms）	1=correct, 0=wrong
103	1	441	0
103	1	426	0
103	1	416	0
103	1	334	0
103	1	386	0
103	1	351	0
103	1	288	0
103	1	404	0
103	1	529	0
103	1	548	0
103	1	0	0
103	1	0	0
103	1	633	0
103	1	407	0
103	1	416	0
103	1	428	0
103	1	395	0
103	1	321	0
103	1	536	0
103	1	210	0
103	1	446	0
103	1	352	0
103	2	499	0
103	2	314	0
103	2	412	0
103	2	530	0
103	2	588	0
103	2	404	0
103	2	438	0
103	2	283	0
103	2	506	0
103	2	427	0
103	2	247	0
103	2	930	0
103	2	258	0
103	2	644	0
103	2	341	0
103	2	613	0
103	2	303	0
103	2	404	0
103	2	362	0
103	2	279	0
103	2	233	0
103	2	472	0
103	1	460	1
103	1	507	1
103	1	550	1
103	1	369	1
103	1	477	1
103	1	526	1
103	1	521	1
103	1	605	1
103	1	340	1
103	1	339	1
103	1	447	1
103	1	548	1
103	1	409	1
103	1	408	1
103	1	464	1
103	1	588	1
103	1	677	1
103	1	487	1
103	1	507	1
103	1	393	1
103	1	404	1
103	1	427	1
103	1	533	1
103	1	553	1
103	1	473	1
103	1	449	1
103	1	397	1
103	1	390	1
103	1	586	1
103	1	603	1
103	1	555	1
103	1	616	1
103	1	53	1
103	1	430	1
103	1	472	1
103	1	570	1
103	1	582	1
103	1	594	1
103	1	222	1
103	1	551	1
103	1	355	1
103	1	443	1
103	1	393	1
103	1	595	1
103	1	546	1
103	1	367	1
103	1	411	1
103	1	327	1
103	1	518	1
103	1	419	1
103	1	388	1
103	1	461	1
103	1	330	1
103	1	383	1
103	1	415	1
103	1	460	1
103	1	575	1
103	1	360	1
103	1	290	1
103	1	353	1
103	1	382	1
103	1	391	1
103	2	568	1
103	2	416	1
103	2	410	1
103	2	352	1
103	2	477	1
103	2	354	1
103	2	399	1
103	2	351	1
103	2	367	1
103	2	430	1
103	2	523	1
103	2	421	1
103	2	576	1
103	2	371	1
103	2	545	1
103	2	493	1
103	2	350	1
103	2	553	1
103	2	534	1
103	2	495	1
103	2	372	1
103	2	519	1
103	2	387	1
103	2	344	1
103	2	406	1
103	2	671	1
103	2	516	1
103	2	567	1
103	2	446	1
103	2	513	1
103	2	605	1
103	2	477	1
103	2	640	1
103	2	586	1
103	2	248	1
103	2	365	1
103	2	479	1
103	2	530	1
103	2	570	1
103	2	481	1
103	2	324	1
103	2	407	1
103	2	454	1
103	2	932	1
103	2	460	1
103	2	463	1
103	2	342	1
103	2	499	1
103	2	370	1
103	2	355	1
103	2	289	1
103	2	401	1
103	2	494	1
103	2	386	1
103	2	481	1
103	2	484	1
103	2	473	1
103	2	449	1
103	2	220	1
103	2	340	1
103	2	477	1
103	2	279	1

## Sheet: 104
Subject	Condition 1=congruent, 2=incongruent	Reaction time（ms）	1=correct, 0=wrong
104	1	407	0
104	1	519	0
104	1	115	0
104	1	427	0
104	1	454	0
104	1	689	0
104	1	400	0
104	1	259	0
104	1	395	0
104	1	164	0
104	1	421	0
104	1	482	0
104	1	366	0
104	1	259	0
104	1	437	0
104	1	355	0
104	1	314	0
104	1	365	0
104	1	339	0
104	1	384	0
104	1	426	0
104	1	381	0
104	1	362	0
104	1	423	0
104	1	302	0
104	2	264	0
104	2	358	0
104	2	689	0
104	2	657	0
104	2	445	0
104	2	355	0
104	2	660	0
104	2	392	0
104	2	492	0
104	2	358	0
104	2	458	0
104	2	502	0
104	2	375	0
104	2	268	0
104	2	298	0
104	2	353	0
104	2	407	0
104	2	349	0
104	2	378	0
104	2	242	0
104	2	444	0
104	2	388	0
104	2	335	0
104	2	383	0
104	2	350	0
104	2	396	0
104	2	356	0
104	2	326	0
104	2	374	0
104	2	378	0
104	1	412	1
104	1	347	1
104	1	379	1
104	1	357	1
104	1	566	1
104	1	366	1
104	1	498	1
104	1	540	1
104	1	371	1
104	1	476	1
104	1	491	1
104	1	389	1
104	1	371	1
104	1	493	1
104	1	407	1
104	1	582	1
104	1	368	1
104	1	420	1
104	1	565	1
104	1	359	1
104	1	365	1
104	1	381	1
104	1	366	1
104	1	379	1
104	1	252	1
104	1	313	1
104	1	387	1
104	1	351	1
104	1	510	1
104	1	327	1
104	1	346	1
104	1	475	1
104	1	332	1
104	1	481	1
104	1	616	1
104	1	465	1
104	1	545	1
104	1	347	1
104	1	318	1
104	1	511	1
104	1	507	1
104	1	486	1
104	1	481	1
104	1	425	1
104	1	652	1
104	1	478	1
104	1	453	1
104	1	525	1
104	1	646	1
104	1	432	1
104	1	500	1
104	1	401	1
104	1	455	1
104	1	362	1
104	1	345	1
104	1	540	1
104	1	381	1
104	1	256	1
104	1	506	1
104	2	344	1
104	2	470	1
104	2	554	1
104	2	753	1
104	2	430	1
104	2	412	1
104	2	480	1
104	2	453	1
104	2	381	1
104	2	377	1
104	2	459	1
104	2	401	1
104	2	394	1
104	2	326	1
104	2	462	1
104	2	476	1
104	2	357	1
104	2	540	1
104	2	629	1
104	2	302	1
104	2	339	1
104	2	475	1
104	2	423	1
104	2	380	1
104	2	401	1
104	2	350	1
104	2	642	1
104	2	559	1
104	2	349	1
104	2	465	1
104	2	507	1
104	2	452	1
104	2	394	1
104	2	475	1
104	2	405	1
104	2	545	1
104	2	403	1
104	2	397	1
104	2	352	1
104	2	546	1
104	2	443	1
104	2	506	1
104	2	389	1
104	2	387	1
104	2	449	1
104	2	422	1
104	2	319	1
104	2	304	1
104	2	502	1
104	2	284	1
104	2	387	1
104	2	366	1
104	2	336	1
104	2	350	1

## Sheet: 105
Subject	Condition 1=congruent, 2=incongruent	Reaction time（ms）	1=correct, 0=wrong
105	1	417	0
105	1	472	0
105	1	506	0
105	1	486	0
105	1	663	0
105	1	0	0
105	1	378	0
105	1	452	0
105	1	459	0
105	1	564	0
105	1	413	0
105	1	535	0
105	1	441	0
105	1	593	0
105	2	573	0
105	2	488	0
105	2	586	0
105	2	469	0
105	2	434	0
105	2	487	0
105	2	464	0
105	2	481	0
105	2	558	0
105	2	468	0
105	2	351	0
105	2	441	0
105	1	411	1
105	1	558	1
105	1	642	1
105	1	479	1
105	1	454	1
105	1	542	1
105	1	463	1
105	1	529	1
105	1	583	1
105	1	546	1
105	1	404	1
105	1	576	1
105	1	659	1
105	1	430	1
105	1	666	1
105	1	680	1
105	1	436	1
105	1	550	1
105	1	580	1
105	1	419	1
105	1	478	1
105	1	521	1
105	1	502	1
105	1	528	1
105	1	715	1
105	1	726	1
105	1	516	1
105	1	457	1
105	1	547	1
105	1	521	1
105	1	637	1
105	1	539	1
105	1	587	1
105	1	578	1
105	1	448	1
105	1	489	1
105	1	609	1
105	1	651	1
105	1	727	1
105	1	523	1
105	1	418	1
105	1	604	1
105	1	499	1
105	1	478	1
105	1	741	1
105	1	529	1
105	1	587	1
105	1	430	1
105	1	473	1
105	1	463	1
105	1	558	1
105	1	479	1
105	1	483	1
105	1	576	1
105	1	554	1
105	1	528	1
105	1	514	1
105	1	443	1
105	1	537	1
105	1	573	1
105	1	616	1
105	1	456	1
105	1	554	1
105	1	588	1
105	1	548	1
105	1	565	1
105	1	513	1
105	1	639	1
105	1	469	1
105	1	452	1
105	2	592	1
105	2	363	1
105	2	420	1
105	2	465	1
105	2	672	1
105	2	534	1
105	2	410	1
105	2	470	1
105	2	662	1
105	2	399	1
105	2	376	1
105	2	430	1
105	2	654	1
105	2	452	1
105	2	617	1
105	2	599	1
105	2	525	1
105	2	492	1
105	2	573	1
105	2	511	1
105	2	576	1
105	2	554	1
105	2	607	1
105	2	640	1
105	2	540	1
105	2	383	1
105	2	380	1
105	2	578	1
105	2	431	1
105	2	484	1
105	2	518	1
105	2	423	1
105	2	566	1
105	2	788	1
105	2	442	1
105	2	689	1
105	2	445	1
105	2	468	1
105	2	636	1
105	2	583	1
105	2	456	1
105	2	473	1
105	2	525	1
105	2	502	1
105	2	502	1
105	2	452	1
105	2	561	1
105	2	582	1
105	2	655	1
105	2	467	1
105	2	549	1
105	2	545	1
105	2	583	1
105	2	508	1
105	2	627	1
105	2	664	1
105	2	580	1
105	2	472	1
105	2	536	1
105	2	564	1
105	2	428	1
105	2	593	1
105	2	502	1
105	2	509	1
105	2	506	1
105	2	379	1
105	2	607	1
105	2	415	1
105	2	470	1
105	2	421	1
105	2	509	1
105	2	467	1

## Sheet: 106
Subject	Condition 1=congruent, 2=incongruent	Reaction time（ms）	1=correct, 0=wrong
106	1	465	0
106	1	408	0
106	1	291	0
106	1	306	0
106	1	587	0
106	1	393	0
106	1	384	0
106	1	499	0
106	1	435	0
106	1	464	0
106	1	373	0
106	2	519	0
106	2	612	0
106	2	369	0
106	2	400	0
106	2	411	0
106	2	372	0
106	2	415	0
106	2	326	0
106	2	454	0
106	2	393	0
106	2	309	0
106	2	497	0
106	2	329	0
106	2	357	0
106	2	450	0
106	2	390	0
106	2	366	0
106	2	362	0
106	2	435	0
106	2	493	0
106	1	458	1
106	1	449	1
106	1	502	1
106	1	630	1
106	1	633	1
106	1	506	1
106	1	363	1
106	1	591	1
106	1	485	1
106	1	426	1
106	1	466	1
106	1	475	1
106	1	323	1
106	1	448	1
106	1	537	1
106	1	410	1
106	1	585	1
106	1	508	1
106	1	528	1
106	1	497	1
106	1	407	1
106	1	424	1
106	1	547	1
106	1	470	1
106	1	625	1
106	1	456	1
106	1	401	1
106	1	353	1
106	1	521	1
106	1	445	1
106	1	349	1
106	1	448	1
106	1	421	1
106	1	541	1
106	1	435	1
106	1	468	1
106	1	506	1
106	1	437	1
106	1	443	1
106	1	540	1
106	1	414	1
106	1	314	1
106	1	463	1
106	1	330	1
106	1	502	1
106	1	467	1
106	1	495	1
106	1	556	1
106	1	454	1
106	1	412	1
106	1	376	1
106	1	454	1
106	1	473	1
106	1	379	1
106	1	447	1
106	1	523	1
106	1	507	1
106	1	415	1
106	1	425	1
106	1	382	1
106	1	538	1
106	1	409	1
106	1	352	1
106	1	471	1
106	1	364	1
106	1	483	1
106	1	389	1
106	1	453	1
106	1	341	1
106	1	491	1
106	1	360	1
106	1	448	1
106	1	456	1
106	2	712	1
106	2	521	1
106	2	563	1
106	2	460	1
106	2	535	1
106	2	448	1
106	2	340	1
106	2	499	1
106	2	475	1
106	2	493	1
106	2	591	1
106	2	545	1
106	2	315	1
106	2	321	1
106	2	386	1
106	2	350	1
106	2	384	1
106	2	592	1
106	2	441	1
106	2	626	1
106	2	331	1
106	2	381	1
106	2	488	1
106	2	544	1
106	2	438	1
106	2	511	1
106	2	322	1
106	2	406	1
106	2	497	1
106	2	471	1
106	2	414	1
106	2	558	1
106	2	413	1
106	2	506	1
106	2	484	1
106	2	465	1
106	2	465	1
106	2	551	1
106	2	543	1
106	2	456	1
106	2	443	1
106	2	457	1
106	2	514	1
106	2	558	1
106	2	500	1
106	2	412	1
106	2	372	1
106	2	415	1
106	2	321	1
106	2	367	1
106	2	430	1
106	2	493	1
106	2	498	1
106	2	556	1
106	2	322	1
106	2	391	1
106	2	341	1
106	2	300	1
106	2	544	1
106	2	362	1
106	2	478	1
106	2	528	1
106	2	421	1
106	2	355	1

## Sheet: 107
Subject	Condition 1=congruent, 2=incongruent	Reaction time（ms）	1=correct, 0=wrong
107	1	469	0
107	1	522	0
107	1	541	0
107	1	482	0
107	1	565	0
107	1	500	0
107	1	526	0
107	1	404	0
107	1	450	0
107	1	398	0
107	1	524	0
107	1	480	0
107	1	442	0
107	1	535	0
107	2	468	0
107	2	534	0
107	2	444	0
107	2	0	0
107	2	296	0
107	2	448	0
107	2	581	0
107	2	398	0
107	2	473	0
107	2	394	0
107	2	553	0
107	2	396	0
107	2	636	0
107	2	646	0
107	2	557	0
107	1	636	1
107	1	537	1
107	1	488	1
107	1	545	1
107	1	652	1
107	1	571	1
107	1	618	1
107	1	533	1
107	1	529	1
107	1	498	1
107	1	658	1
107	1	534	1
107	1	451	1
107	1	408	1
107	1	519	1
107	1	551	1
107	1	471	1
107	1	493	1
107	1	465	1
107	1	570	1
107	1	604	1
107	1	383	1
107	1	496	1
107	1	377	1
107	1	512	1
107	1	467	1
107	1	548	1
107	1	531	1
107	1	421	1
107	1	542	1
107	1	407	1
107	1	531	1
107	1	426	1
107	1	391	1
107	1	582	1
107	1	411	1
107	1	500	1
107	1	448	1
107	1	430	1
107	1	414	1
107	1	766	1
107	1	741	1
107	1	580	1
107	1	482	1
107	1	553	1
107	1	467	1
107	1	507	1
107	1	507	1
107	1	445	1
107	1	417	1
107	1	416	1
107	1	570	1
107	1	593	1
107	1	709	1
107	1	365	1
107	1	574	1
107	1	414	1
107	1	426	1
107	1	401	1
107	1	579	1
107	1	709	1
107	1	643	1
107	1	577	1
107	1	518	1
107	1	820	1
107	1	593	1
107	1	675	1
107	1	484	1
107	1	506	1
107	1	502	1
107	2	485	1
107	2	377	1
107	2	642	1
107	2	446	1
107	2	437	1
107	2	467	1
107	2	468	1
107	2	538	1
107	2	487	1
107	2	592	1
107	2	442	1
107	2	516	1
107	2	540	1
107	2	431	1
107	2	612	1
107	2	700	1
107	2	485	1
107	2	576	1
107	2	535	1
107	2	593	1
107	2	677	1
107	2	566	1
107	2	627	1
107	2	508	1
107	2	484	1
107	2	572	1
107	2	459	1
107	2	428	1
107	2	665	1
107	2	572	1
107	2	488	1
107	2	813	1
107	2	468	1
107	2	663	1
107	2	495	1
107	2	475	1
107	2	551	1
107	2	502	1
107	2	528	1
107	2	497	1
107	2	694	1
107	2	529	1
107	2	591	1
107	2	589	1
107	2	421	1
107	2	388	1
107	2	583	1
107	2	482	1
107	2	430	1
107	2	415	1
107	2	525	1
107	2	450	1
107	2	446	1
107	2	450	1
107	2	404	1
107	2	417	1
107	2	606	1
107	2	648	1
107	2	749	1
107	2	480	1
107	2	440	1
107	2	593	1
107	2	535	1
107	2	585	1
107	2	500	1
107	2	551	1
107	2	652	1
107	2	551	1
107	2	433	1

## Sheet: 108
Subject	Condition 1=congruent, 2=incongruent	Reaction time（ms）	1=correct, 0=wrong
108	1	472	0
108	1	506	0
108	1	350	0
108	1	442	0
108	1	402	0
108	1	449	0
108	1	442	0
108	1	365	0
108	1	347	0
108	1	401	0
108	1	464	0
108	1	417	0
108	1	471	0
108	1	398	0
108	1	473	0
108	1	451	0
108	1	582	0
108	1	580	0
108	2	390	0
108	2	416	0
108	2	450	0
108	2	608	0
108	2	455	0
108	2	410	0
108	2	437	0
108	2	389	0
108	2	613	0
108	2	606	0
108	2	531	0
108	2	430	0
108	2	480	0
108	2	360	0
108	2	519	0
108	2	480	0
108	2	427	0
108	2	519	0
108	2	358	0
108	2	497	0
108	2	426	0
108	2	435	0
108	2	364	0
108	2	324	0
108	1	426	1
108	1	556	1
108	1	553	1
108	1	465	1
108	1	371	1
108	1	453	1
108	1	467	1
108	1	539	1
108	1	467	1
108	1	487	1
108	1	535	1
108	1	567	1
108	1	530	1
108	1	536	1
108	1	456	1
108	1	557	1
108	1	485	1
108	1	420	1
108	1	436	1
108	1	507	1
108	1	546	1
108	1	419	1
108	1	477	1
108	1	651	1
108	1	494	1
108	1	357	1
108	1	381	1
108	1	499	1
108	1	642	1
108	1	483	1
108	1	417	1
108	1	434	1
108	1	535	1
108	1	517	1
108	1	336	1
108	1	454	1
108	1	455	1
108	1	481	1
108	1	478	1
108	1	388	1
108	1	408	1
108	1	478	1
108	1	531	1
108	1	390	1
108	1	476	1
108	1	617	1
108	1	461	1
108	1	422	1
108	1	357	1
108	1	486	1
108	1	438	1
108	1	415	1
108	1	383	1
108	1	519	1
108	1	378	1
108	1	485	1
108	1	465	1
108	1	428	1
108	1	436	1
108	1	598	1
108	1	409	1
108	1	406	1
108	1	422	1
108	1	398	1
108	1	434	1
108	1	474	1
108	2	626	1
108	2	516	1
108	2	357	1
108	2	492	1
108	2	517	1
108	2	483	1
108	2	423	1
108	2	597	1
108	2	473	1
108	2	542	1
108	2	444	1
108	2	336	1
108	2	496	1
108	2	334	1
108	2	500	1
108	2	455	1
108	2	471	1
108	2	518	1
108	2	425	1
108	2	498	1
108	2	369	1
108	2	327	1
108	2	500	1
108	2	470	1
108	2	467	1
108	2	469	1
108	2	489	1
108	2	479	1
108	2	521	1
108	2	569	1
108	2	354	1
108	2	490	1
108	2	517	1
108	2	430	1
108	2	458	1
108	2	527	1
108	2	474	1
108	2	471	1
108	2	506	1
108	2	493	1
108	2	525	1
108	2	477	1
108	2	482	1
108	2	388	1
108	2	593	1
108	2	492	1
108	2	428	1
108	2	487	1
108	2	511	1
108	2	606	1
108	2	528	1
108	2	458	1
108	2	613	1
108	2	503	1
108	2	515	1
108	2	520	1
108	2	606	1
108	2	467	1
108	2	391	1
108	2	542	1

[truncated: 43 more sheets: 109, 110, 111, 112, 113, 114, 115, 116, 117, 118, 119, 120, 121, 122, 123, 124, 125, 126, 201, 202 …]
